# Supplementary material for: Polymerization-induced self-assembly of random bottlebrush copolymers
Source: Royal Society of Chemistry journal article supplement (doi:10.1039/d2py00858k), 2022-01-01
Supplement: d2py00858k1.pdf [file d2py00858k1.pdf]

# Polymerization-induced self-assembly of random bottlebrush copolymers

Gaohuai Mei, ‡<sup>a</sup> Yinan Zheng, ‡<sup>a</sup> Yeran Fu <sup>a</sup> and Meng Huo <sup>\*a</sup>

<sup>a</sup> Department of Chemistry, Key Laboratory of Surface & Interface Science of Polymer Materials  
of Zhejiang Province, Zhejiang Sci-Tech University, Hangzhou 310018, China

‡G. Mei and Y. Zheng contributed equally.

\* E-Mail: huomeng@zstu.edu.cn (M. H.)

**Table S1** Molecular characterization of the P(PEGMA<sub>x</sub>-co-HEMA<sub>y</sub>) copolymers.

| Entry <sup>a</sup>                 | Molar feed ratio       |  | DP <sub>PEGMA</sub> <sup>b</sup> | DP <sub>HEMA</sub> <sup>b</sup> | $M_{n, NMR}/kDa^b$ | $M_{n, SEC}/kDa^c$ | $\mathcal{D}^d$ |
|------------------------------------|------------------------|--|----------------------------------|---------------------------------|--------------------|--------------------|-----------------|
|                                    | (CPADB/PEGMA/<br>HEMA) |  |                                  |                                 |                    |                    |                 |
| G <sub>26</sub> -H <sub>31</sub>   | 1/31.3/31.3            |  | 26                               | 31                              | 29.0               | 21.7               | 1.45            |
| G <sub>73</sub> -H <sub>74</sub>   | 1/62.5/62.5            |  | 73                               | 74                              | 79.0               | 35.8               | 1.72            |
| G <sub>141</sub> -H <sub>142</sub> | 1/125/125              |  | 141                              | 142                             | 153                | 63.7               | 1.73            |

<sup>a</sup> G<sub>x</sub>-H<sub>y</sub> stands for P(PEGMA<sub>x</sub>-co-HEMA<sub>y</sub>).

<sup>b</sup> Calculated according to <sup>1</sup>H NMR.

<sup>c</sup> Determined by SEC.

<sup>d</sup>  $\mathcal{D} = M_w/M_n$ .

**Table S2** Molecular characterization of the P[PEGMA<sub>x</sub>-co-(HEMA-*g*-TTC)<sub>y</sub>] copolymers.

| Entry <sup>a</sup>                     | Grafting efficiency<br>of TTC/% | $M_{n, NMR}/kDa^b$ | $M_{n, SEC}/kDa^c$ | $\mathcal{D}^d$ |
|----------------------------------------|---------------------------------|--------------------|--------------------|-----------------|
| G <sub>26</sub> -(H-T) <sub>31</sub>   | 80.6                            | 38.0               | 28.9               | 1.62            |
| G <sub>73</sub> -(H-T) <sub>74</sub>   | 79.7                            | 100                | 56.5               | 1.46            |
| G <sub>141</sub> -(H-T) <sub>142</sub> | 83.1                            | 196                | 94.4               | 1.43            |

<sup>a</sup> G<sub>x</sub>-(H-T)<sub>y</sub> stands for P[PEGMA<sub>x</sub>-co-(HEMA-*g*-TTC)<sub>y</sub>].

<sup>b</sup> Calculated according to <sup>1</sup>H NMR.

<sup>c</sup> Determined by SEC.

<sup>d</sup>  $\mathcal{D} = M_w/M_n$ .

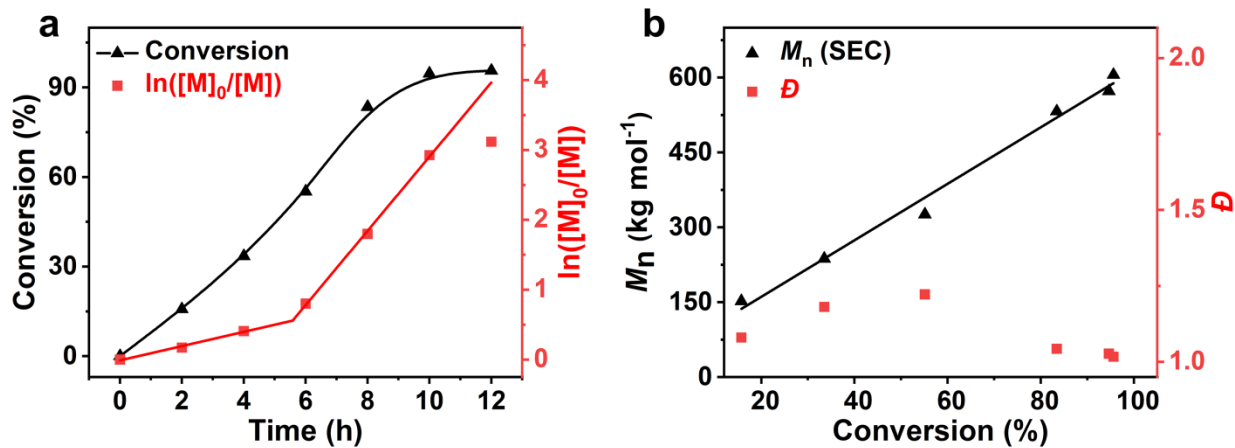

**Fig. S1** Kinetic study for the RAFT dispersion polymerization of styrene in ethanol/water (m/m = 4/1) at a solid content of 20 wt% with  $G_{26}-(H-T)_{31}$  as the macro-CTA.  $[AIBN]/[TTC \text{ of } G_{26}-(H-T)_{31}]/[St] = 0.2/1/75$ . (a) The evolution of monomer conversion and  $\ln([M]_0/[M])$  along with the polymerization time. (b) Evolution of the  $M_n$  and  $\bar{D}$  versus the monomer conversion.

**Table S3** Molecular characterization of the P[PEGMA<sub>x</sub>-co-(HEMA-*g*-PS<sub>z</sub>)<sub>y</sub>] copolymers.

| Entry <sup>a</sup>                                  | Molar feed ratio<br>(St/TTC) | Monomer<br>conversion <sup>b</sup> /% | DP <sub>PS</sub> <sup>b</sup> | <i>M</i> <sub>n, NMR</sub> <sup>b</sup> /kDa |
|-----------------------------------------------------|------------------------------|---------------------------------------|-------------------------------|----------------------------------------------|
| G <sub>26</sub> -H <sub>31</sub> -S <sub>55</sub>   | 50                           | 98.5                                  | 55                            | 181                                          |
| G <sub>26</sub> -H <sub>31</sub> -S <sub>89</sub>   | 75                           | 99.3                                  | 89                            | 270                                          |
| G <sub>26</sub> -H <sub>31</sub> -S <sub>100</sub>  | 100                          | 98.2                                  | 100                           | 298                                          |
| G <sub>26</sub> -H <sub>31</sub> -S <sub>231</sub>  | 200                          | 99.9                                  | 231                           | 639                                          |
| G <sub>73</sub> -H <sub>74</sub> -S <sub>33</sub>   | 25                           | 99.9                                  | 33                            | 303                                          |
| G <sub>73</sub> -H <sub>74</sub> -S <sub>48</sub>   | 50                           | 98.3                                  | 48                            | 395                                          |
| G <sub>73</sub> -H <sub>74</sub> -S <sub>98</sub>   | 100                          | 97.4                                  | 98                            | 702                                          |
| G <sub>73</sub> -H <sub>74</sub> -S <sub>165</sub>  | 200                          | 97.2                                  | 165                           | 1110                                         |
| G <sub>141</sub> -H <sub>142</sub> -S <sub>35</sub> | 25                           | 99.9                                  | 35                            | 626                                          |
| G <sub>141</sub> -H <sub>142</sub> -S <sub>52</sub> | 50                           | 98.3                                  | 52                            | 835                                          |
| G <sub>141</sub> -H <sub>142</sub> -S <sub>67</sub> | 75                           | 99.9                                  | 67                            | 1020                                         |
| G <sub>141</sub> -H <sub>142</sub> -S <sub>94</sub> | 100                          | 97.4                                  | 94                            | 1350                                         |

<sup>a</sup> G<sub>x</sub>-H<sub>y</sub>-S<sub>z</sub> stands for P[PEGMA<sub>x</sub>-co-(HEMA-*g*-PS<sub>z</sub>)<sub>y</sub>].

<sup>b</sup> Calculated according to <sup>1</sup>H NMR.
